# Supplementary material for: Directly grown Co3O4nanowire arrays on Ni-foam: structural effects of carbon-free and binder-free cathodes for lithium–oxygen batteries
Source: Royal Society of Chemistry journal article supplement (doi:10.1039/c4ta01311e), 2014-05-14
Supplement: c4ta01311e1.pdf [file c4ta01311e1.pdf]

## Electronic Supplementary Information (ESI)

### **Directly Grown Co<sub>3</sub>O<sub>4</sub> Nanowire Arrays on Ni-foam: Structural Effect of Carbon-free and Binder-free Cathodes for Lithium Oxygen Batteries**

Hongkyung Lee<sup>a‡</sup>, Yun-Jung Kim<sup>a‡</sup>, Dong Jin Lee<sup>a</sup>, Jongchan Song<sup>a</sup>, Yong Min Lee<sup>b</sup>,  
Hee-Tak Kim<sup>a\*\*</sup> and Jung-Ki Park<sup>a\*</sup>

<sup>a</sup>*Department of Chemical and Biomolecular Engineering, Korea Advanced Institute of Science and Technology, 291, Daehak-ro, Yuseong-gu, Daejeon 305-701, Republic of Korea*

<sup>b</sup>*Department of Applied Chemistry, Hanbat National University, Deokmyoung-dong, Yuseong-gu, Daejeon 305-719, Republic of Korea.*

\* Corresponding author. Tel.: +82-42-350-3925; fax: +82-42-350-3910

E-mail: jungpark@kaist.ac.kr (J. -K. Park),

\*\* Co-corresponding author. Tel.: +82-42-350-3916; fax: +82-42-350-3910

E-mail: heetak.kim@kaist.ac.kr (H. -T. Kim)

‡These authors have contributed equally to this work.

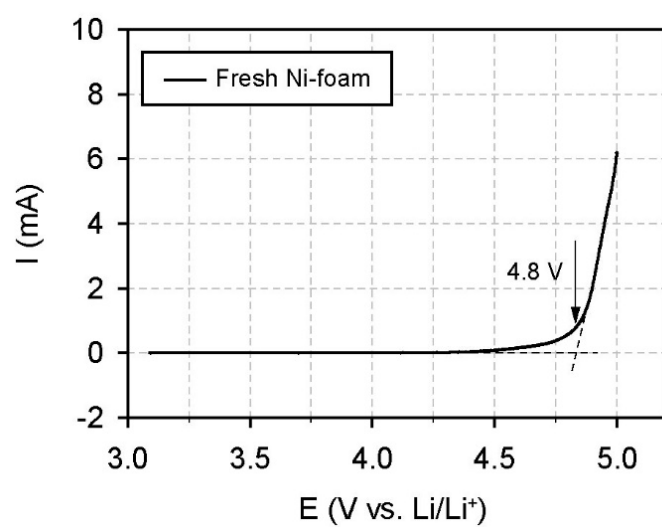

**Fig. S1.** Linear sweep voltammetry of the pristine Ni-foam in the DMSO electrolyte under O<sub>2</sub> atmosphere. (Scan rate: 0.5 mV s<sup>-1</sup>)

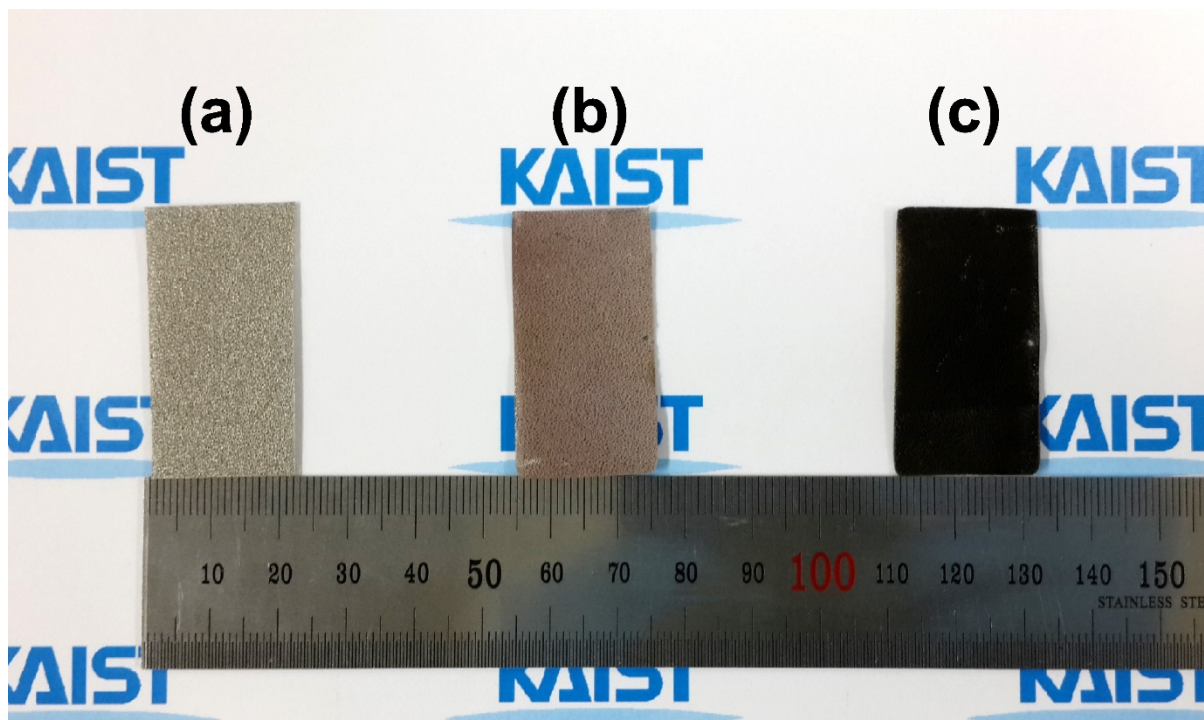

**Fig. S2.** Digital images of (a) pristine Ni-foam, (b) Ni-foam coated with pink precursors  $(\text{Co}(\text{OH})_{1.10}\text{Cl}_{0.2}(\text{CO}_3)_{0.35} \cdot 1.74\text{H}_2\text{O})$  on Ni-foam after a hydrothermal reaction, and (c)  $\text{Co}_3\text{O}_4$  NW@Ni-foam converted by annealing in air at  $250\text{ }^\circ\text{C}$  for 1h

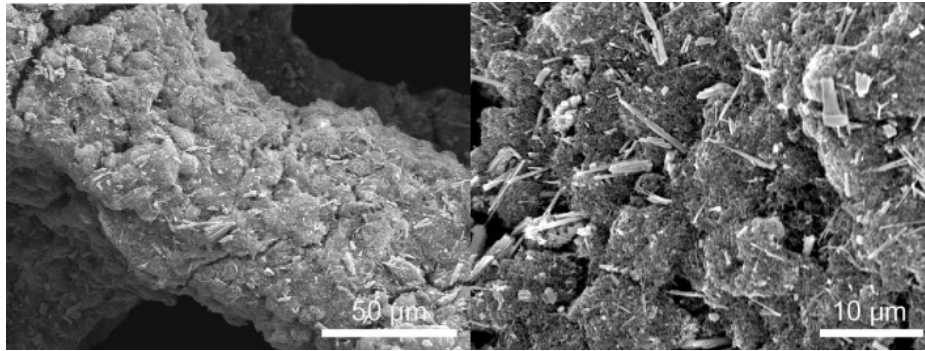

**Fig. S3.** SEM images of the surface of a  $\text{Co}_3\text{O}_4/\text{KB}/\text{PTFE}$  electrode prepared by a conventional slurry mixing method

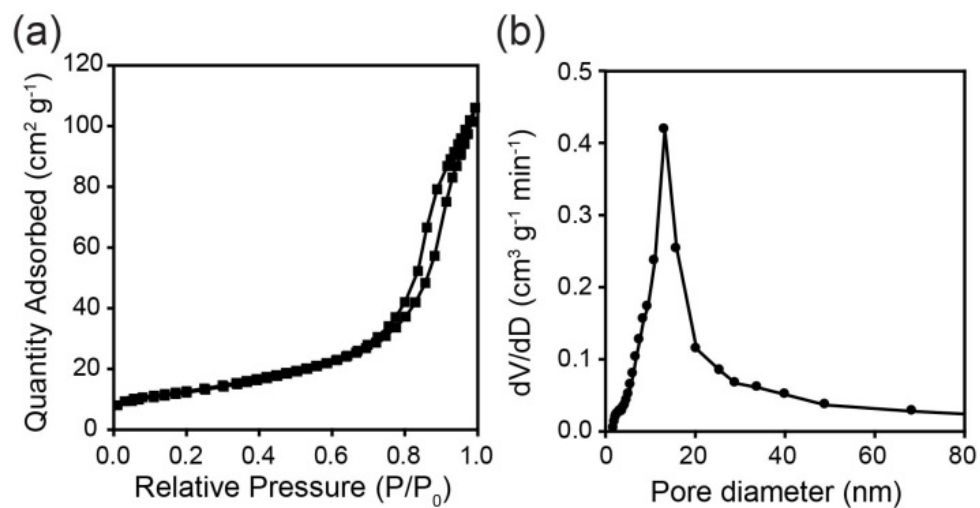

**Fig. S4.** (a) The  $\text{N}_2$  gas adsorption-desorption isotherm loop, and (b) a histogram of the pore size distribution data for the  $\text{Co}_3\text{O}_4$  NWs after a thermal treatment at  $250^\circ\text{C}$

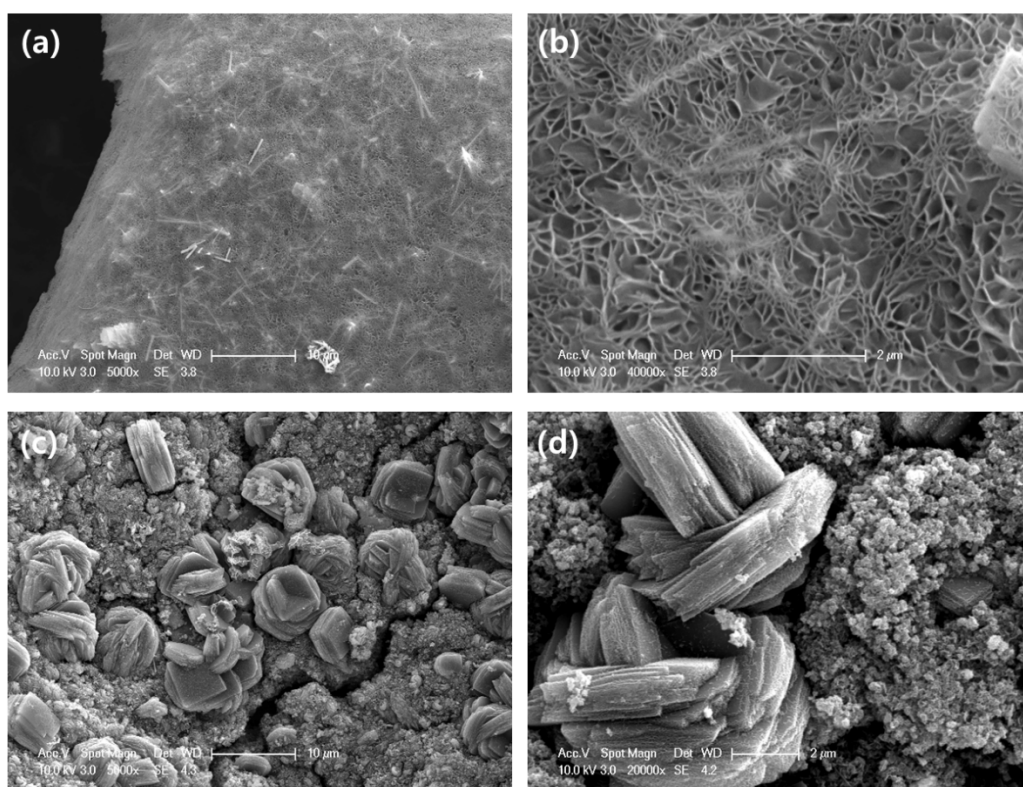

**Fig. S5.** SEM images of the  $\text{Co}_3\text{O}_4/\text{KB}/\text{PTFE}$  electrode ((a) 5000 $\times$ , (b) 40000 $\times$ ) and the  $\text{Co}_3\text{O}_4/\text{KB}/\text{PTFE}$  electrode ((c) 5000 $\times$ , (d) 20000 $\times$ ) taken after the first discharge to 2.25V.

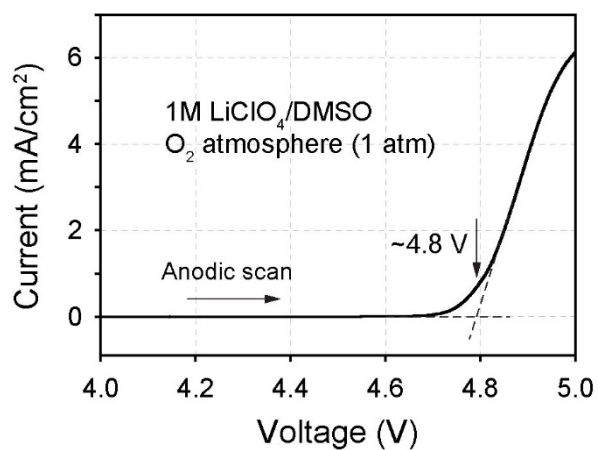

**Fig. S6.** Linear sweep voltammetry of a carbon paper electrode for investigating oxidative stability of the 1M LiClO<sub>4</sub>/DMSO electrolyte under O<sub>2</sub> atmosphere (~1 atm) (scan rate: sweep rate of 0.1 mV s<sup>-1</sup>)

To avoid any interference from the oxidation of Li<sub>2</sub>O<sub>2</sub>, the carbon paper electrode which did not include any discharge products was used in this test.

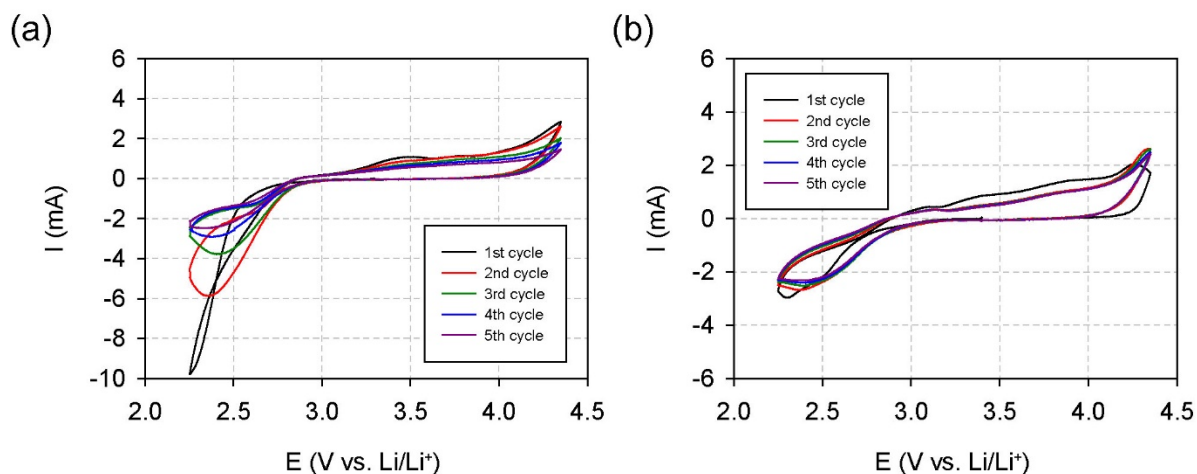

**Fig. S7.** Cyclic voltammetry of Li-O<sub>2</sub> cells with (a) Co<sub>3</sub>O<sub>4</sub>/KB/PTFE and (b) Co<sub>3</sub>O<sub>4</sub> NW@Ni-foam electrodes during five cycles under O<sub>2</sub> atmosphere. The voltage range is 2.25 – 4.35 V vs. Li/Li<sup>+</sup> and a sweep rate is 0.5 mV s<sup>-1</sup>.

As shown in Fig. S7, for the Co<sub>3</sub>O<sub>4</sub>/KB/PTFE electrode, while the first cathodic peak current was significantly high owing to large surface area of highly porous carbon, this peak current was rapidly diminished after the following cycles. Also the anodic current was also gradually decreased with the cycles. Because carbon and binder materials generate irreversible reaction products such as Li<sub>2</sub>CO<sub>3</sub> and LiF, the peak currents for oxygen reduction and evolution reactions decrease as the irreversible products are accumulated and eventually deactivate the air electrode. By contrast, for the Co<sub>3</sub>O<sub>4</sub>NW@Ni-foam, the oxidation and reduction currents were maintained over the cycles. This result indicates a reversibility in oxygen reduction and evolution reactions for the directly grown Co<sub>3</sub>O<sub>4</sub> NWs.



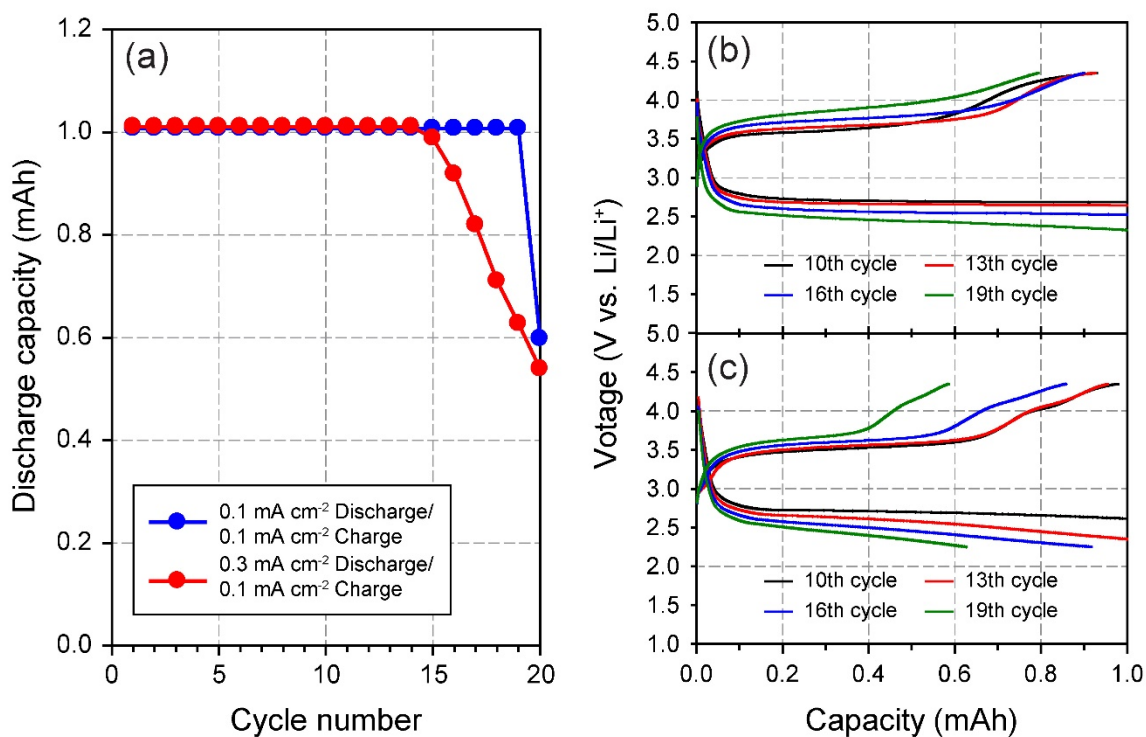

**Fig. S8.** (a) The curtailing cycle performance and discharge–charge profiles after 10 cycles of two cells discharged at (b) 0.1 and (c) 0.3 mA cm<sup>-2</sup>, respectively, after which they were charged at the same charge rate of 0.1 mA cm<sup>-2</sup>
